# Supplementary material for: Design and synthesis of benzothiadiazole–oligothiophene polymers for organic solar cell applications
Source: Royal Society of Chemistry journal article supplement (doi:10.1039/c2py20898a), 2012-12-19
Supplement: c2py20898a.pdf [file c2py20898a.pdf]

## Supporting Information

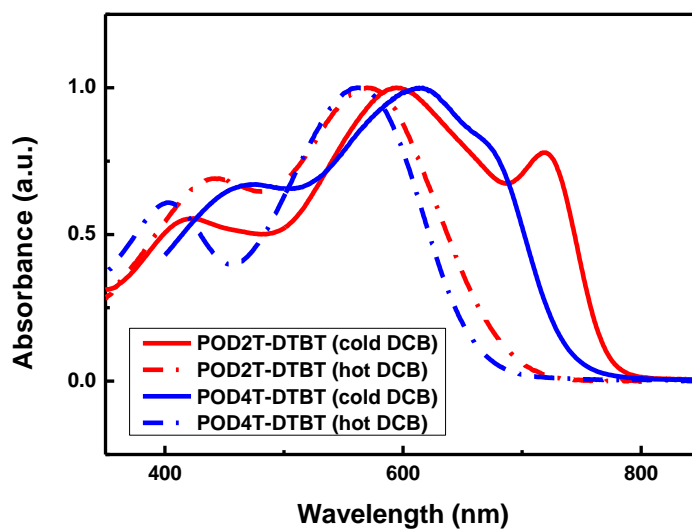

Figure S1: Absorbance of POD2T-DTBT and POD4T-DTBT solutions in dichlorobenzene at room temperature and at elevated temperatures

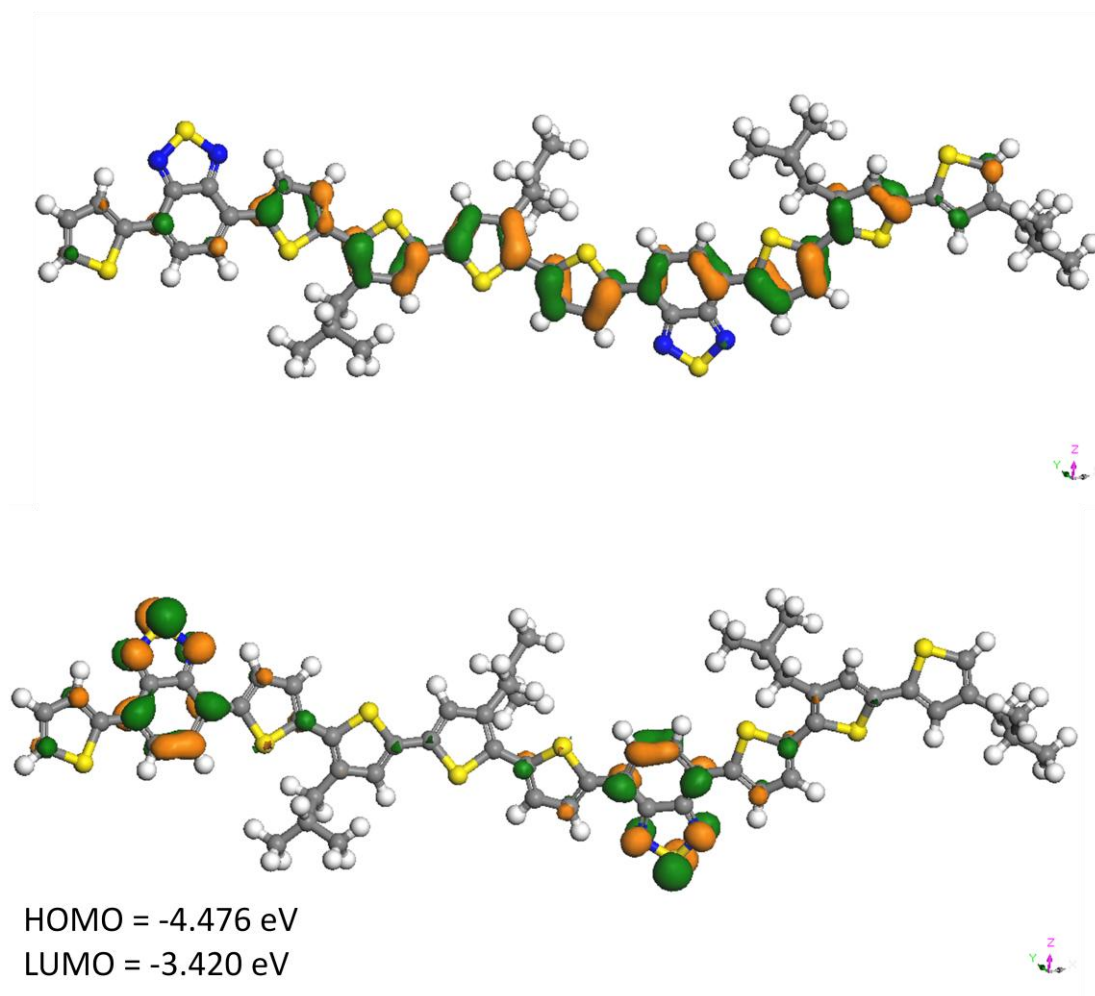

Figure S2: HOMO and LUMO plots for molecules with alkyl chains in the A position

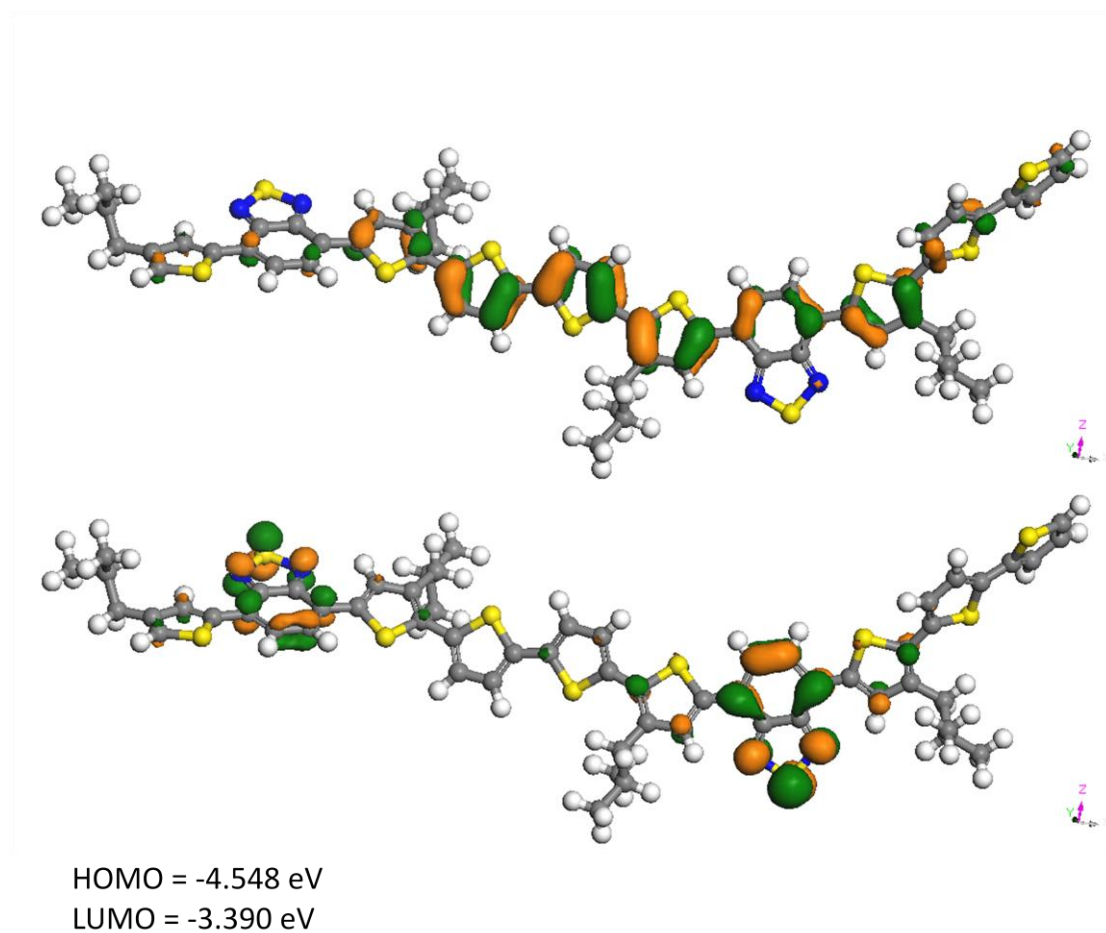

Figure S3: HOMO and LUMO plots for molecules with alkyl chains in the B position

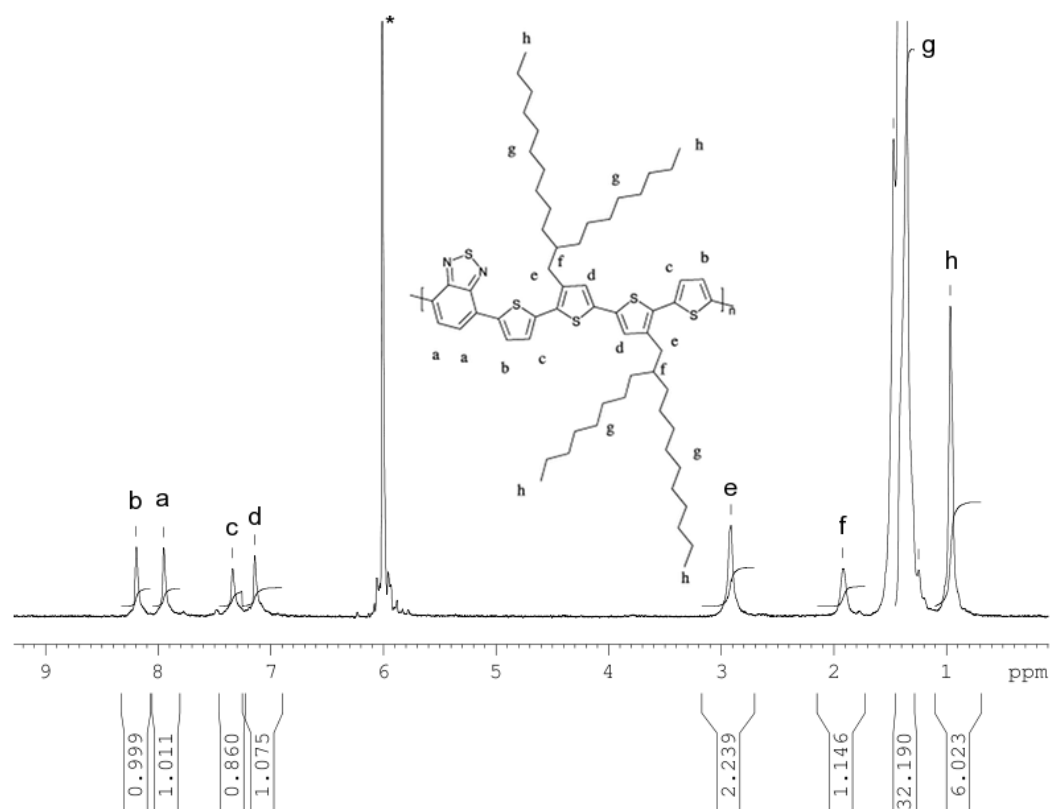

Figure S4:  $^1\text{H}$  NMR spectrum of POD2T-DTBT in  $1,1,2,2\text{-tetrachloroethane-}d_2$  at  $70^\circ\text{C}$ .

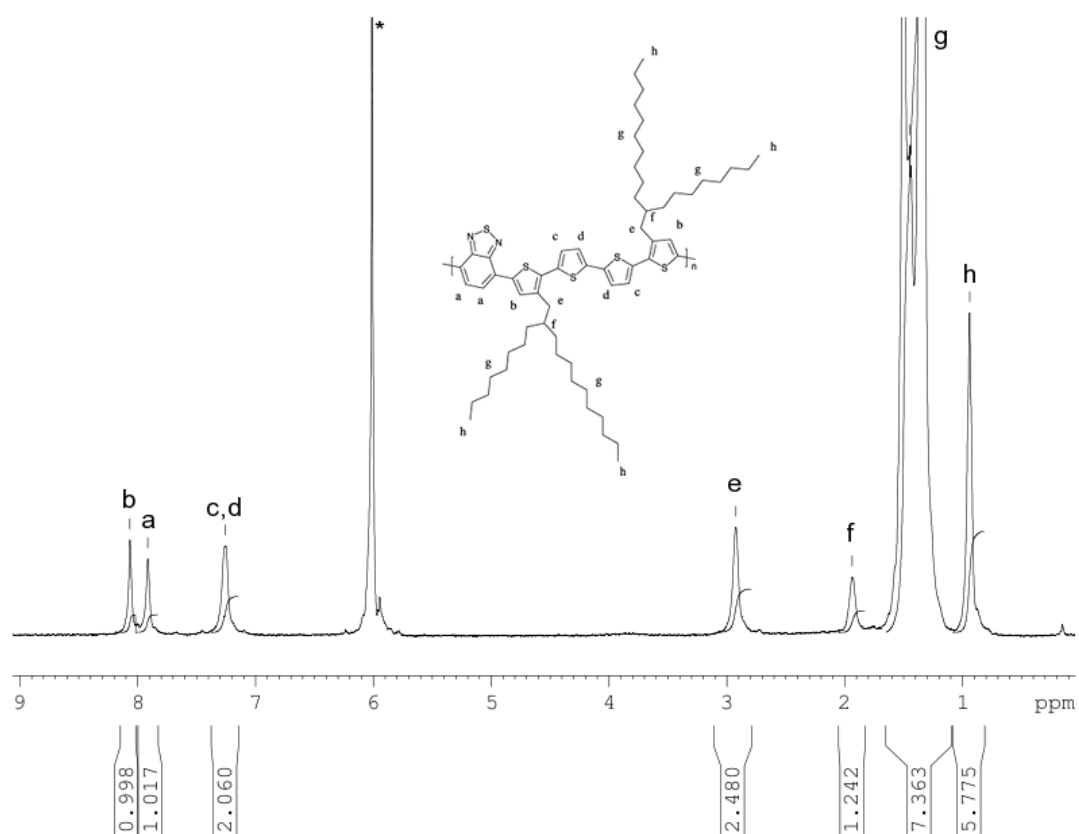

Figure S5:  $^1\text{H}$  NMR Spectrum of P2T-ODDTBT in  $1,1,2,2\text{-tetrachloroethane-}d_2$  at  $70^\circ\text{C}$ .

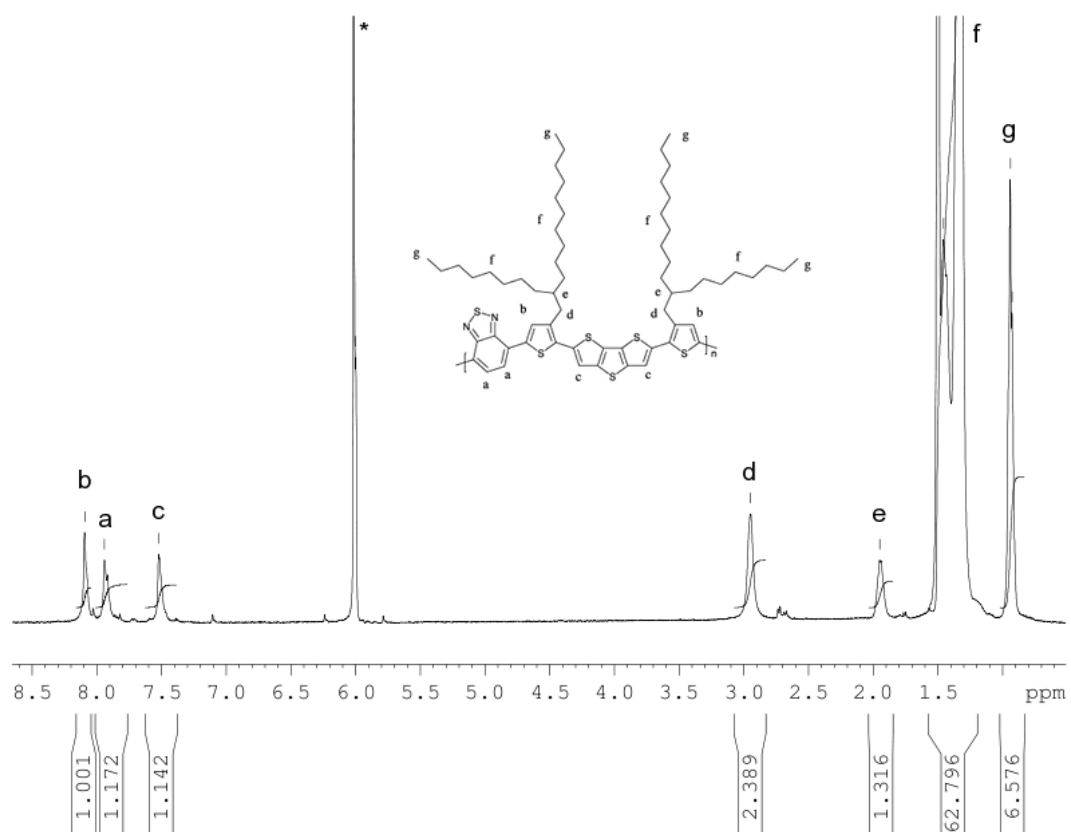

Figure S6:  $^1\text{H}$  NMR spectrum of PDTT-ODDTBT in  $1,1,2,2\text{-tetrachloroethane-}d_2$  at  $70^\circ\text{C}$ .

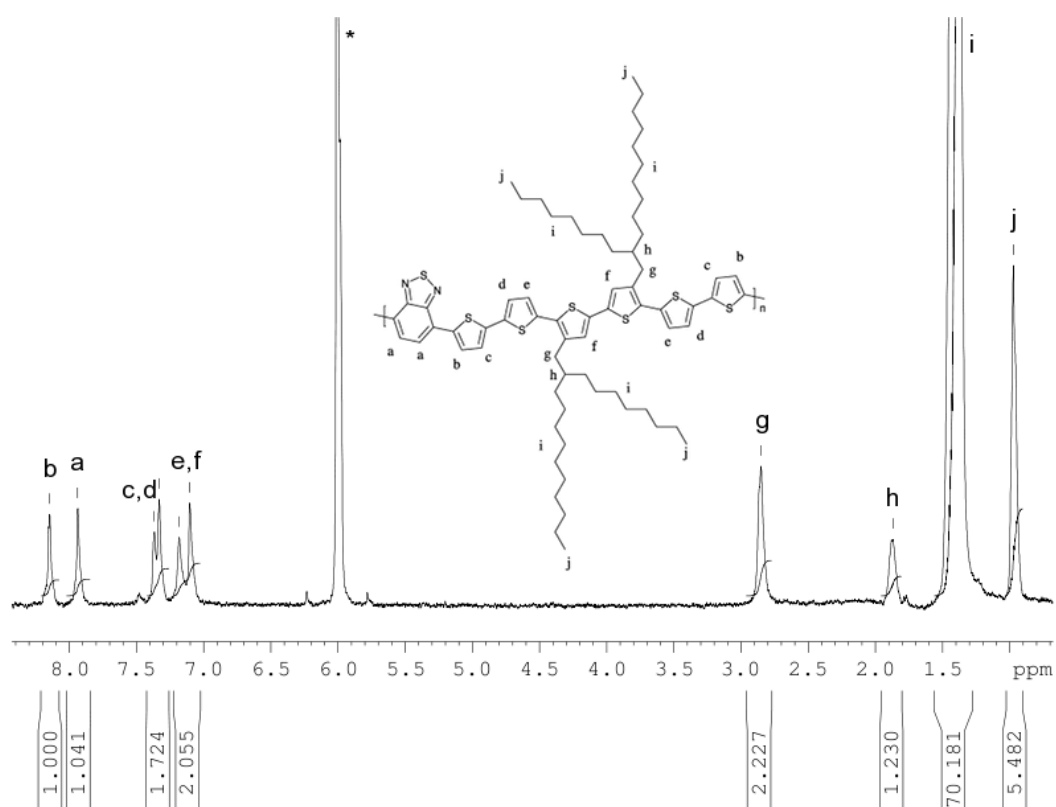

Figure S7:  $^1\text{H}$  NMR spectrum of POD4T-DTBT in 1,1,2,2-tetrachloroethane- $d_2$  at 120 °C.
